# Supplementary material for: The DNA sequence and analysis of human chromosome 14
Source: Springer Nature journal article supplement (doi:10.1038/nature01348), 2003-01-01
Supplement: nature01348-s6.pdf [file nature01348-s6.pdf]

Table 2. Sensitivity of the non-expressed resources in the annotation of the human chromosome 14

| Gene categories            | Nb of exons | Exofish                       | BLAT_Mouse                    | GENSCAN exons                 | FGENESH exons                 | Exofish + BLAT_Mouse          | Exofish + BLAT_Mouse + GENSCAN exons + FGENESH exons |
|----------------------------|-------------|-------------------------------|-------------------------------|-------------------------------|-------------------------------|-------------------------------|------------------------------------------------------|
| <b>Known genes</b>         | 5206        | 2669<br>(52%)<br><i>(82%)</i> | 4121<br>(79%)<br><i>(90%)</i> | 4074<br>(78%)<br><i>(92%)</i> | 3841<br>(74%)<br><i>(90%)</i> | 4382<br>(84%)<br><i>(96%)</i> | 4884<br>(94%)<br><i>(98%)</i>                        |
| <b>Novel genes</b>         | 765         | 204<br>(27%)<br><i>(47%)</i>  | 469<br>(61%)<br><i>(72%)</i>  | 501<br>(65%)<br><i>(71%)</i>  | 421<br>(55%)<br><i>(65%)</i>  | 504<br>(66%)<br><i>(75%)</i>  | 632<br>(83%)<br><i>(85%)</i>                         |
| <b>Novel transcripts</b>   | 32          | 10<br>(31%)<br><i>(55%)</i>   | 12<br>(38%)<br><i>(55%)</i>   | 17<br>(53%)<br><i>(73%)</i>   | 14<br>(44%)<br><i>(64%)</i>   | 15<br>(47%)<br><i>(64%)</i>   | 21<br>(66%)<br><i>(82%)</i>                          |
| <b>Predicted genes</b>     | 68          | 28<br>(41%)<br><i>(82%)</i>   | 47<br>(69%)<br><i>(100%)</i>  | 50<br>(74%)<br><i>(91%)</i>   | 57<br>(84%)<br><i>(100%)</i>  | 50<br>(74%)<br><i>(100%)</i>  | 68<br>(100%)<br><i>(100%)</i>                        |
| <b>Putative genes</b>      | 600         | 19<br>(3%)<br><i>(7%)</i>     | 97<br>(16%)<br><i>(32%)</i>   | 42<br>(7%)<br><i>(17%)</i>    | 35<br>(6%)<br><i>(11%)</i>    | 99<br>(17%)<br><i>(33%)</i>   | 141<br>(24%)<br><i>(46%)</i>                         |
| <b>Gene segments</b>       | 346         | 31<br>(9%)                    | 167<br>(48%)                  | 184<br>(53%)                  | 173<br>(50%)                  | 167<br>(48%)                  | 242<br>(70%)                                         |
| <b>Pseudogene segments</b> | 147         | 10<br>(6%)                    | 69<br>(44%)                   | 54<br>(34%)                   | 4<br>(25%)                    | 69<br>(47%)                   | 96<br>(65%)                                          |
| <b>Pseudogenes</b>         | 321         | 222<br>(69%)                  | 255<br>(79%)                  | 172<br>(54%)                  | 118<br>(37%)                  | 291<br>(91%)                  | 303<br>(94%)                                         |
| <b>All categories</b>      | <b>7495</b> | <b>3193</b><br><b>(42%)</b>   | <b>5237</b><br><b>(70%)</b>   | <b>5094</b><br><b>(68%)</b>   | <b>4663</b><br><b>(62%)</b>   | <b>5577</b><br><b>(74%)</b>   | <b>6387</b><br><b>(83%)</b>                          |

Definitions of the categories are described in the main article. The total number of exons in each category is indicated in the second column. The number and the fraction (in brackets) of exons identified with the various resources or with combinations of resources are indicated in the following columns. The values in italics correspond to the fractions of *gene models* identified with the various resources or combinations.
